# Supplementary material for: Erythrocyte-Targeted Therapy for Glaucoma: Neuroprotection Through Erythrocyte-Derived Sphingosine 1-Phosphate-Enhanced Fatty Acid β-Oxidation via the AMPKα-CPT1A Axis
Source: Research Square preprint supplement (doi:10.21203/rs.3.rs-8165516/v1), 2025-12-03
Supplement: Supplementary file 1 [file e554ce889d9f78c4580cf748.docx]

Supplementary Materials

**This file includes:**

Figure. S1 to S6

Table S1 to S2

**
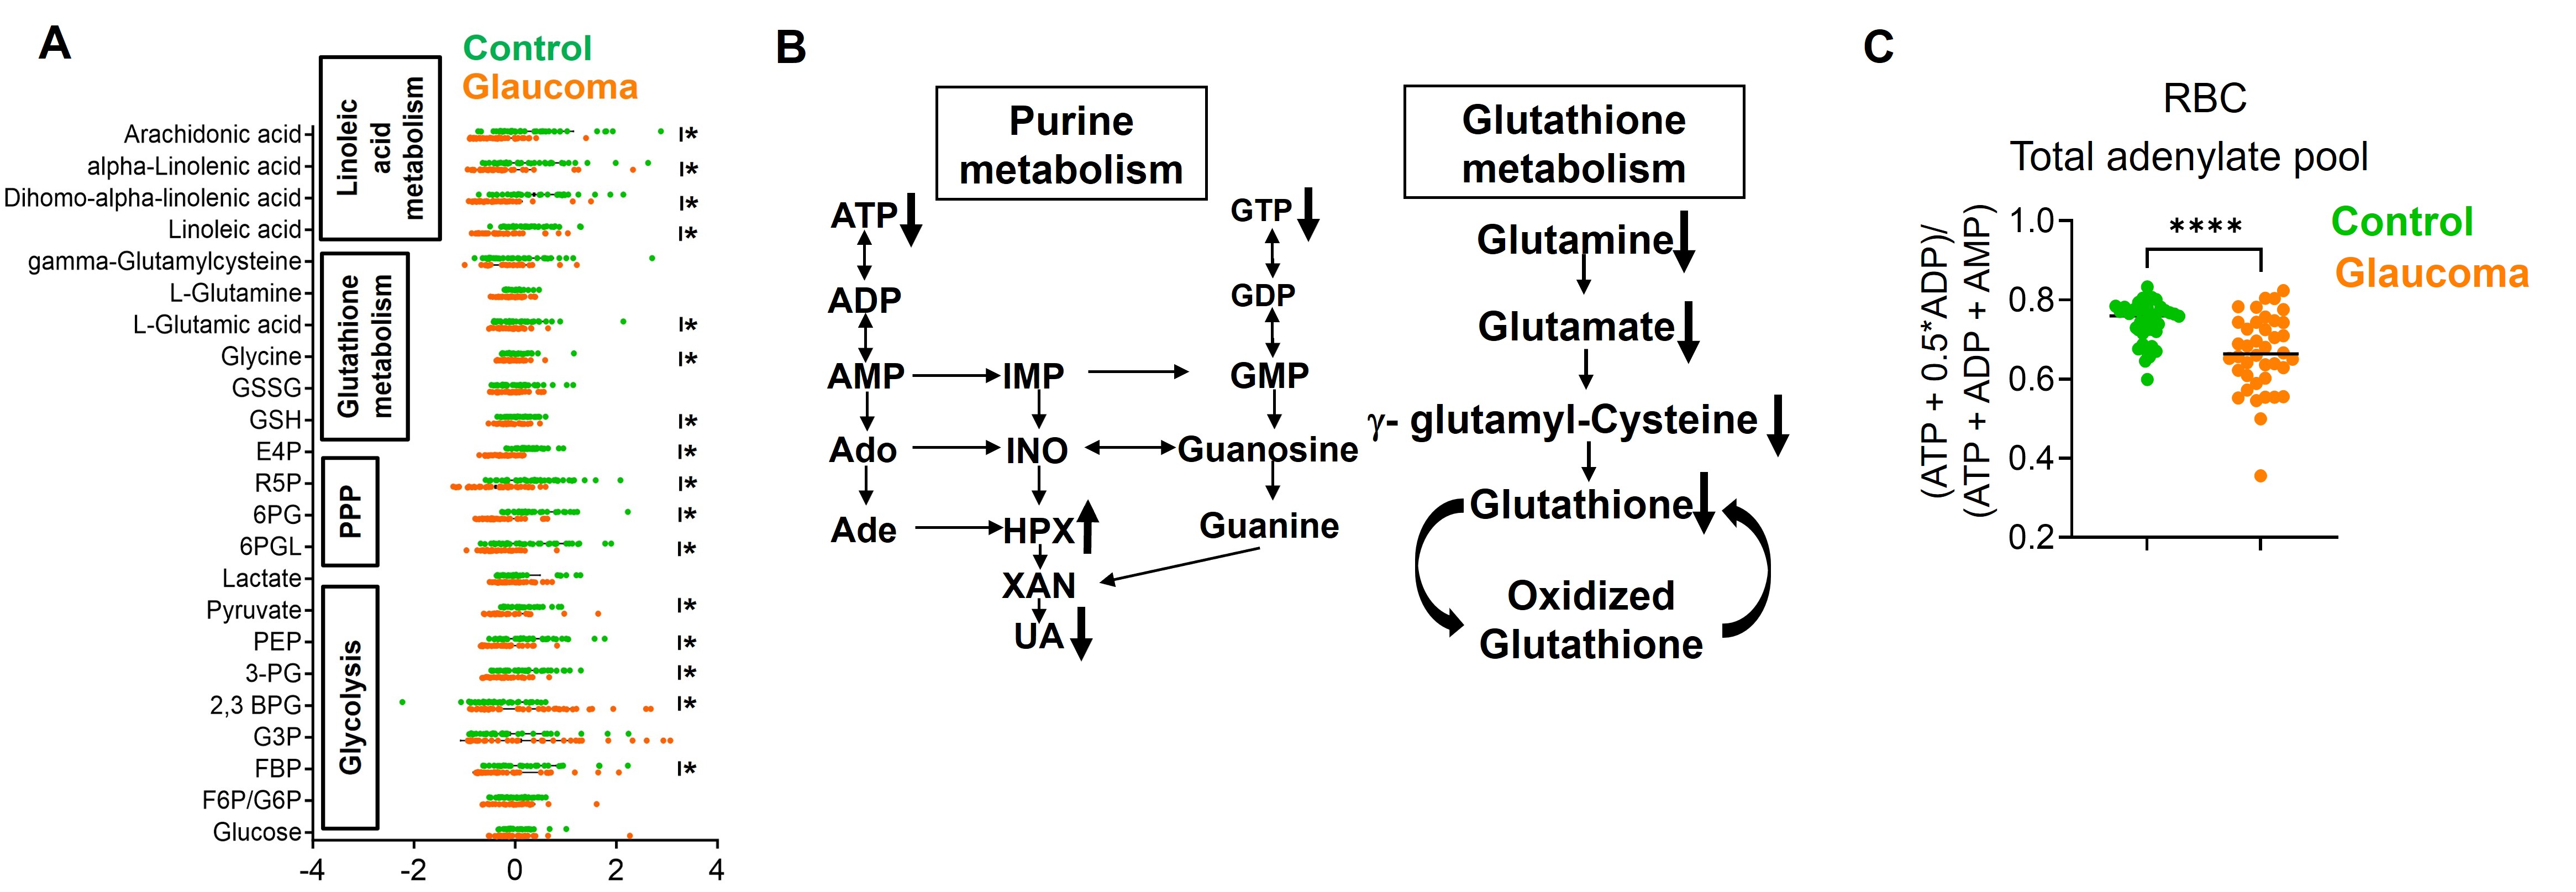
**

**Figure S1. The indicated metabolic pathway in erythrocytes from control and glaucoma subjects.** (A-B) Indicated erythrocyte intermediates of glycolysis, PPP, purine metabolism, linoleic acid metabolism and glutathione metabolism were revealed by untargeted metabolomics (n=40). (C) Total adenylate pools (AXP-calculated as (ATP + 0.5*ADP)/(ATP + ADP + AMP)) were measured in primary glaucoma and control erythrocytes (n=40). *P* were assessed by two-tailed unpaired t test, * *P* < 0.05.

**
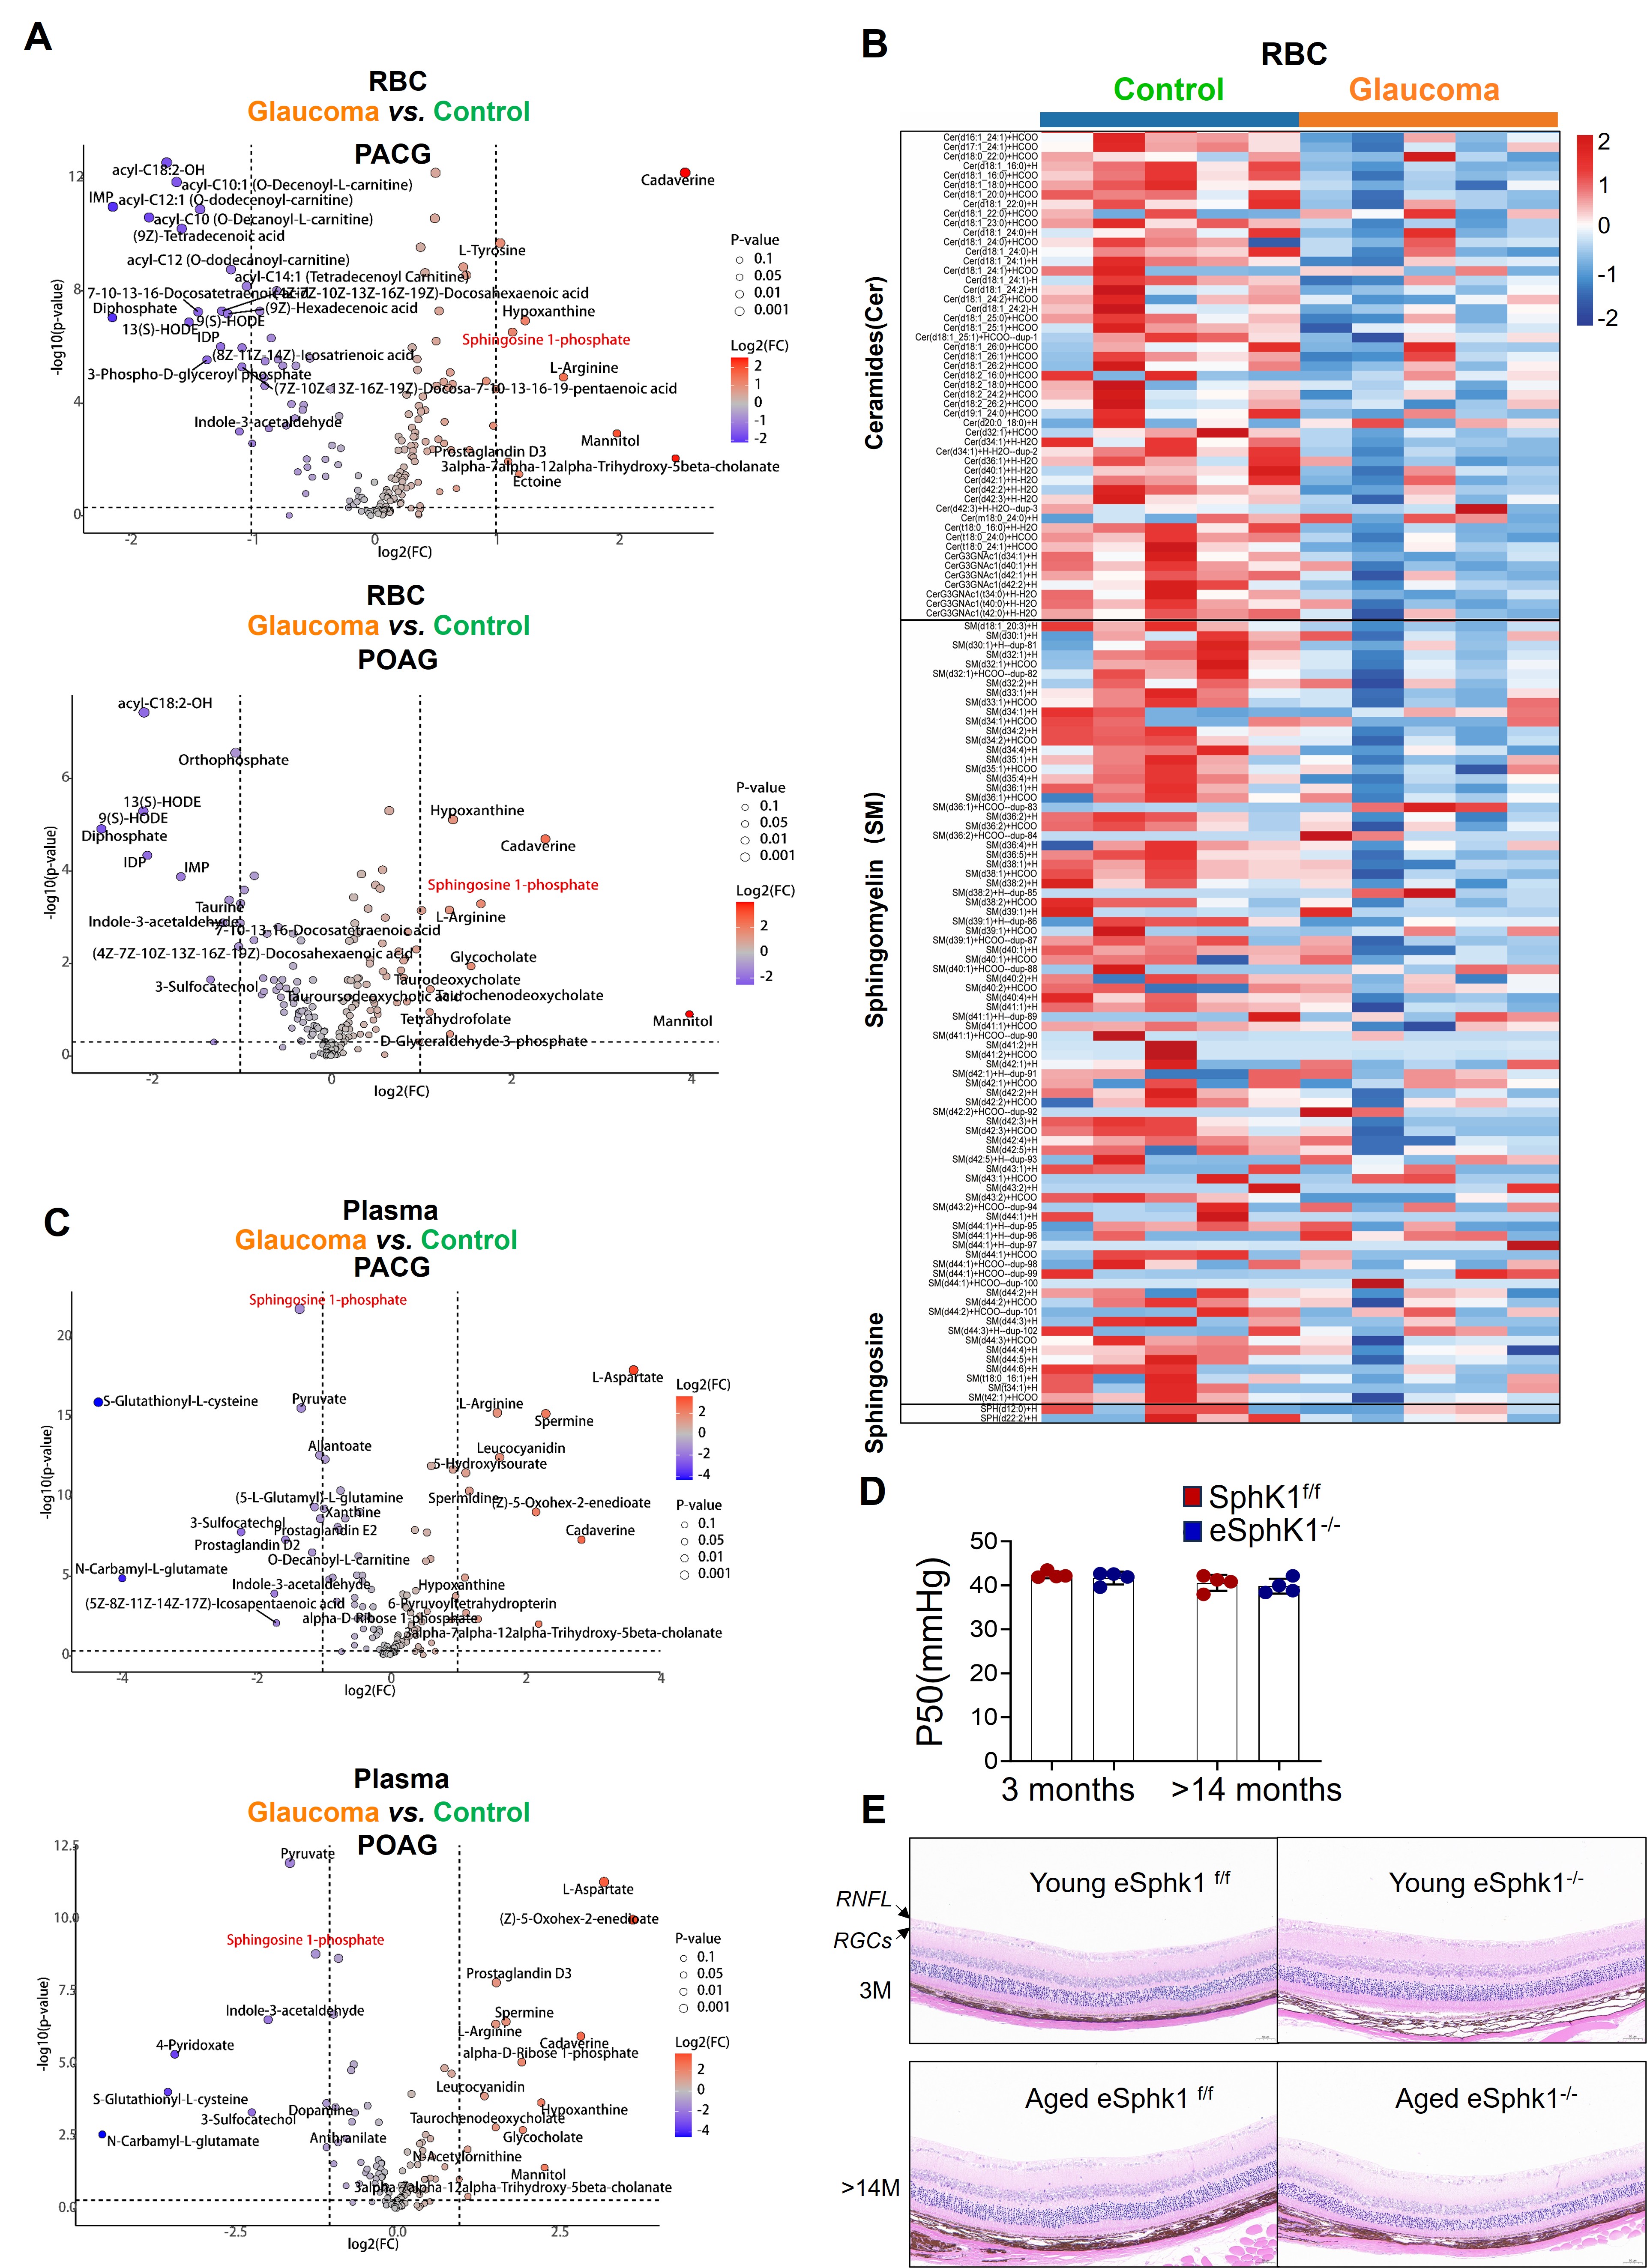
**

**Figure S2. Metabolic intermediates in sphingolipid metabolism pathway in erythrocytes.** (A) Featured metabolites with significant differences between erythrocytes of primary glaucoma subgroup and control group were shown in volcano plot. (B) Heat map of metabolic intermediate from sphingolipid metabolism in erythrocytes. (C) Featured metabolites with significant differences between erythrocytes of primary glaucoma subgroup and control group were shown in volcano plot. (D) The P50 value of erythrocytes in naïve young and aged *Sphk1flox* and *eSphk1-/-* mice (n=4). (E) Histology of retinal tissue of young and aged *Sphk1flox* and *eSphk1-/-* mice in normal conditions. *P* were assessed by two-tailed unpaired t test, * *P* < 0.05.


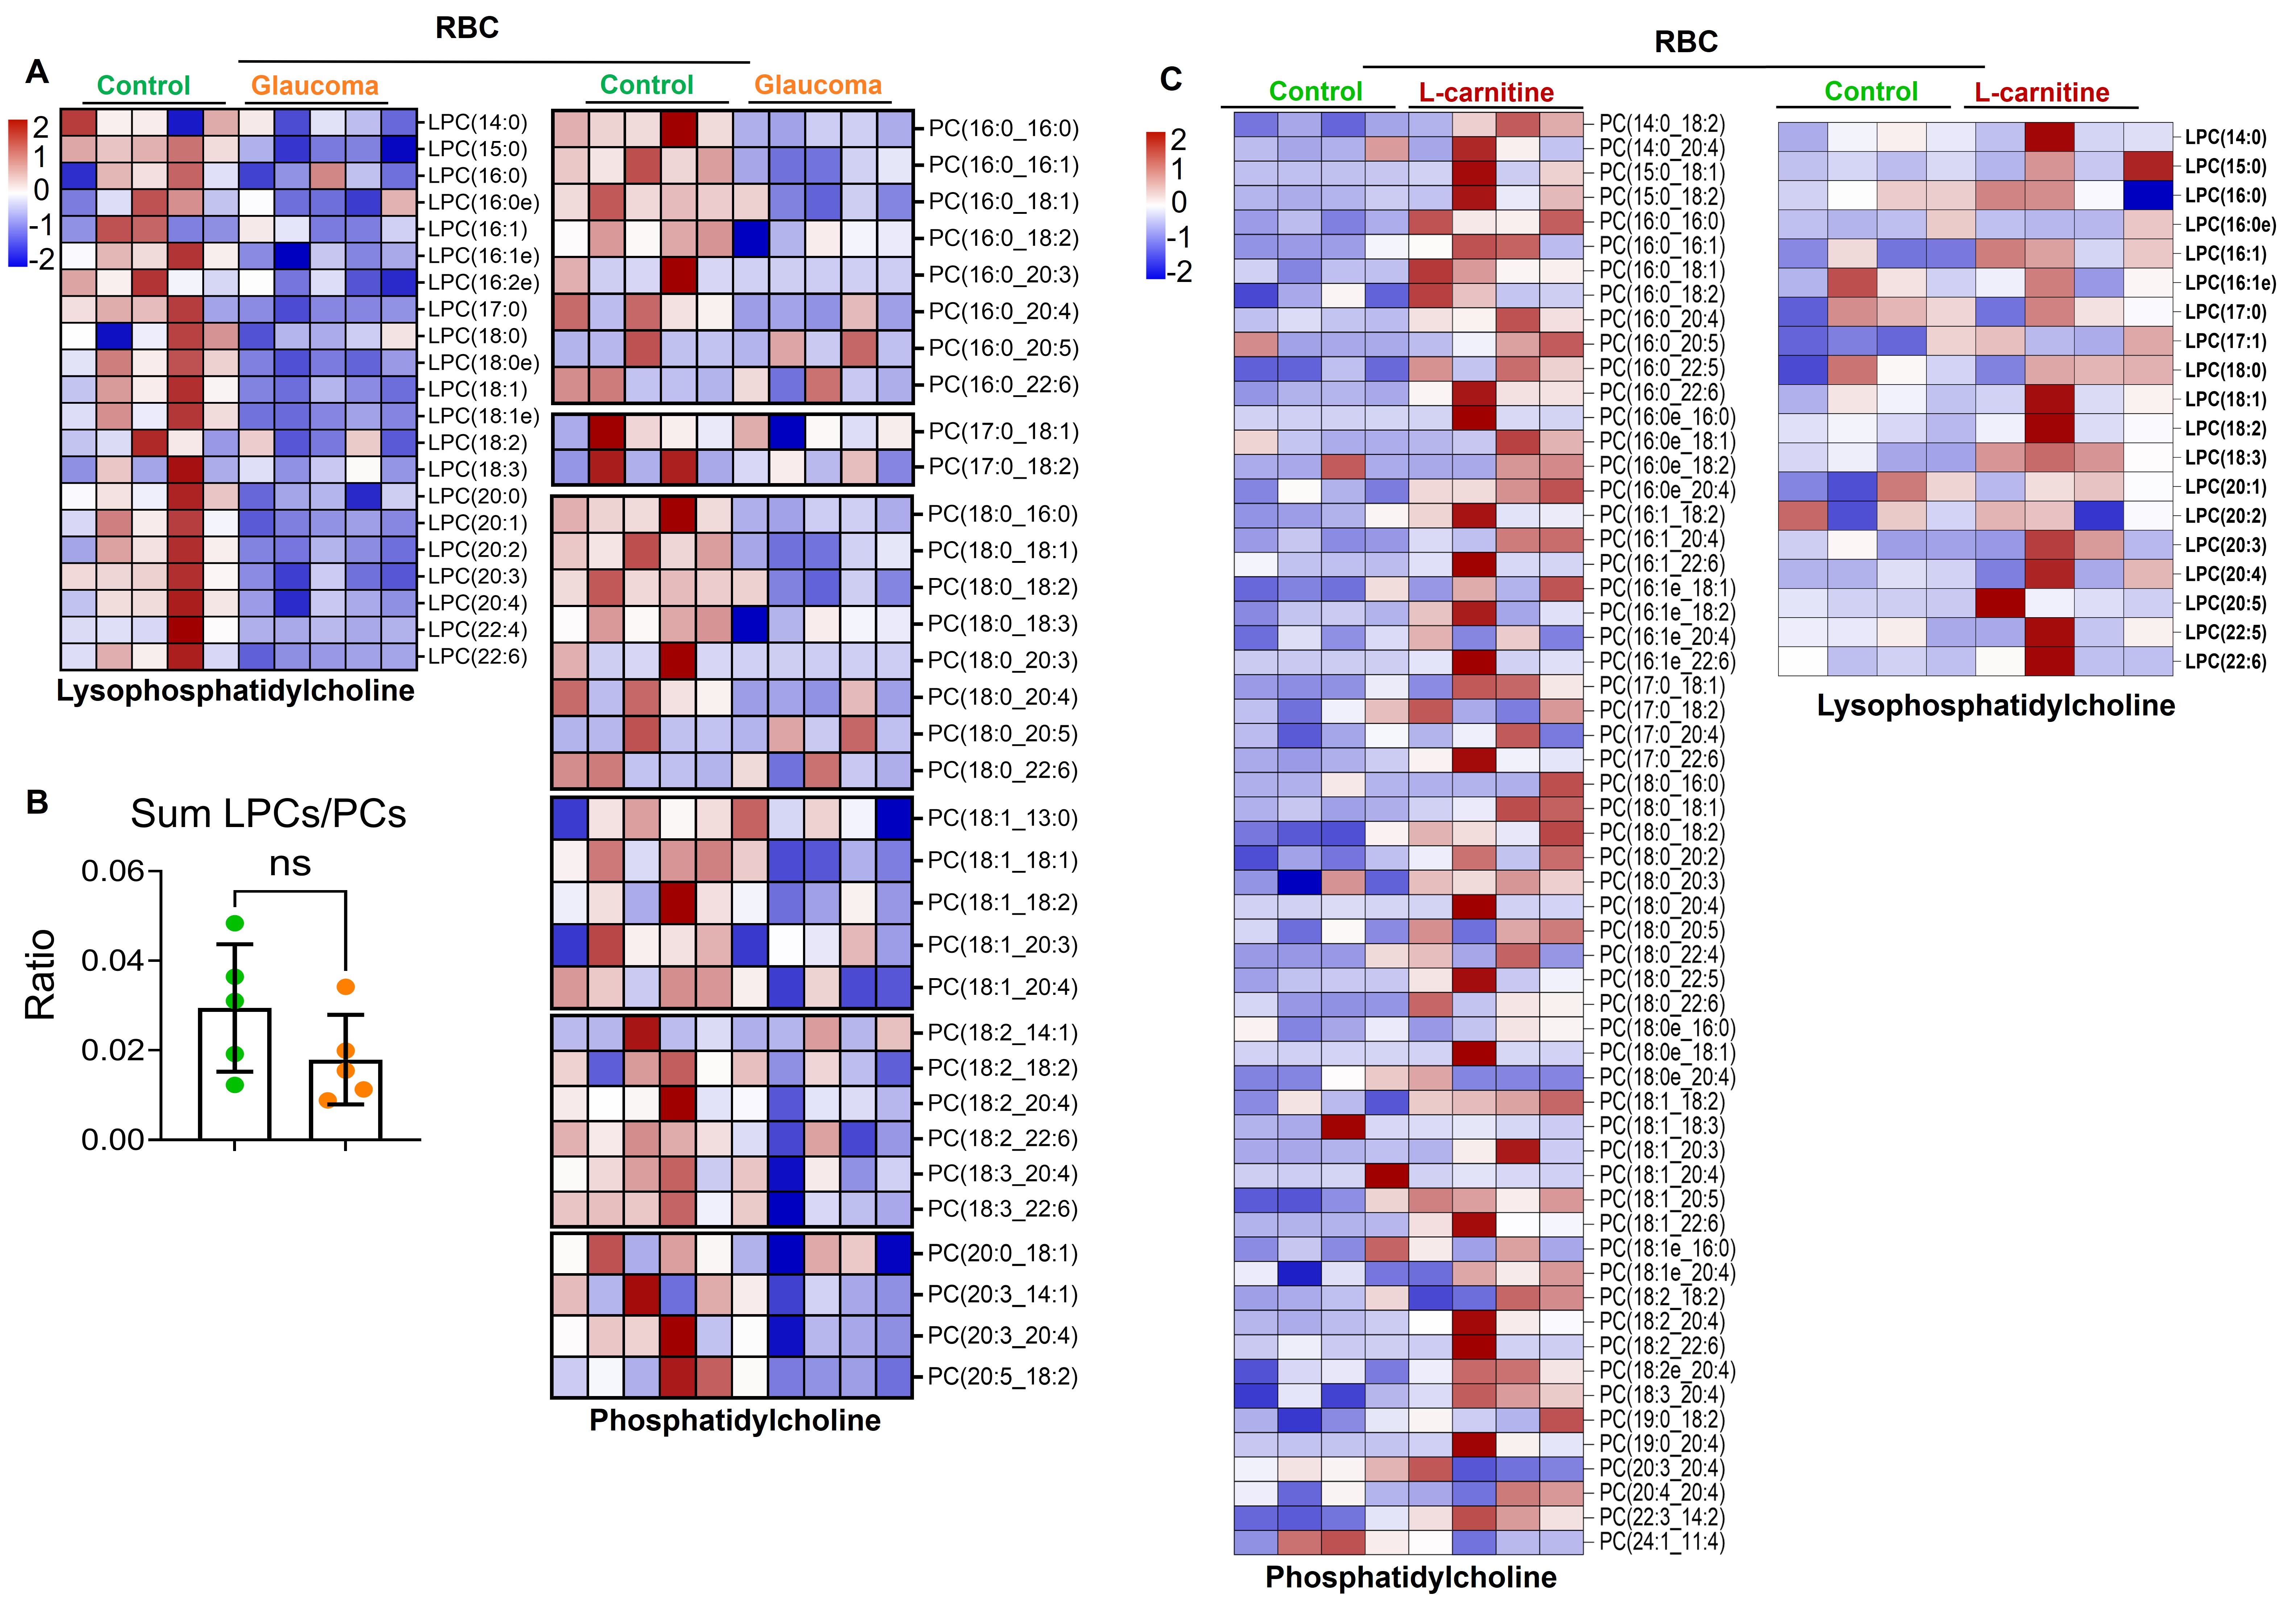


**Figure S3. Lipid and metabolic alterations in glaucoma erythrocytes.** (A) Heat map of lipid composition in control and glaucoma erythrocytes, measured by untargeted lipidomic analysis. Lipid species are categorized by the Lands cycle. (B) Ratio of total lysophosphatidylcholines (LPCs) to phosphatidylcholines (PCs) in control and glaucoma erythrocytes(n=5). (C) Heat map of lipid composition in glaucoma erythrocytes treated with or without L-carnitine, measured by untargeted lipidomic analysis. *P* were assessed by two-
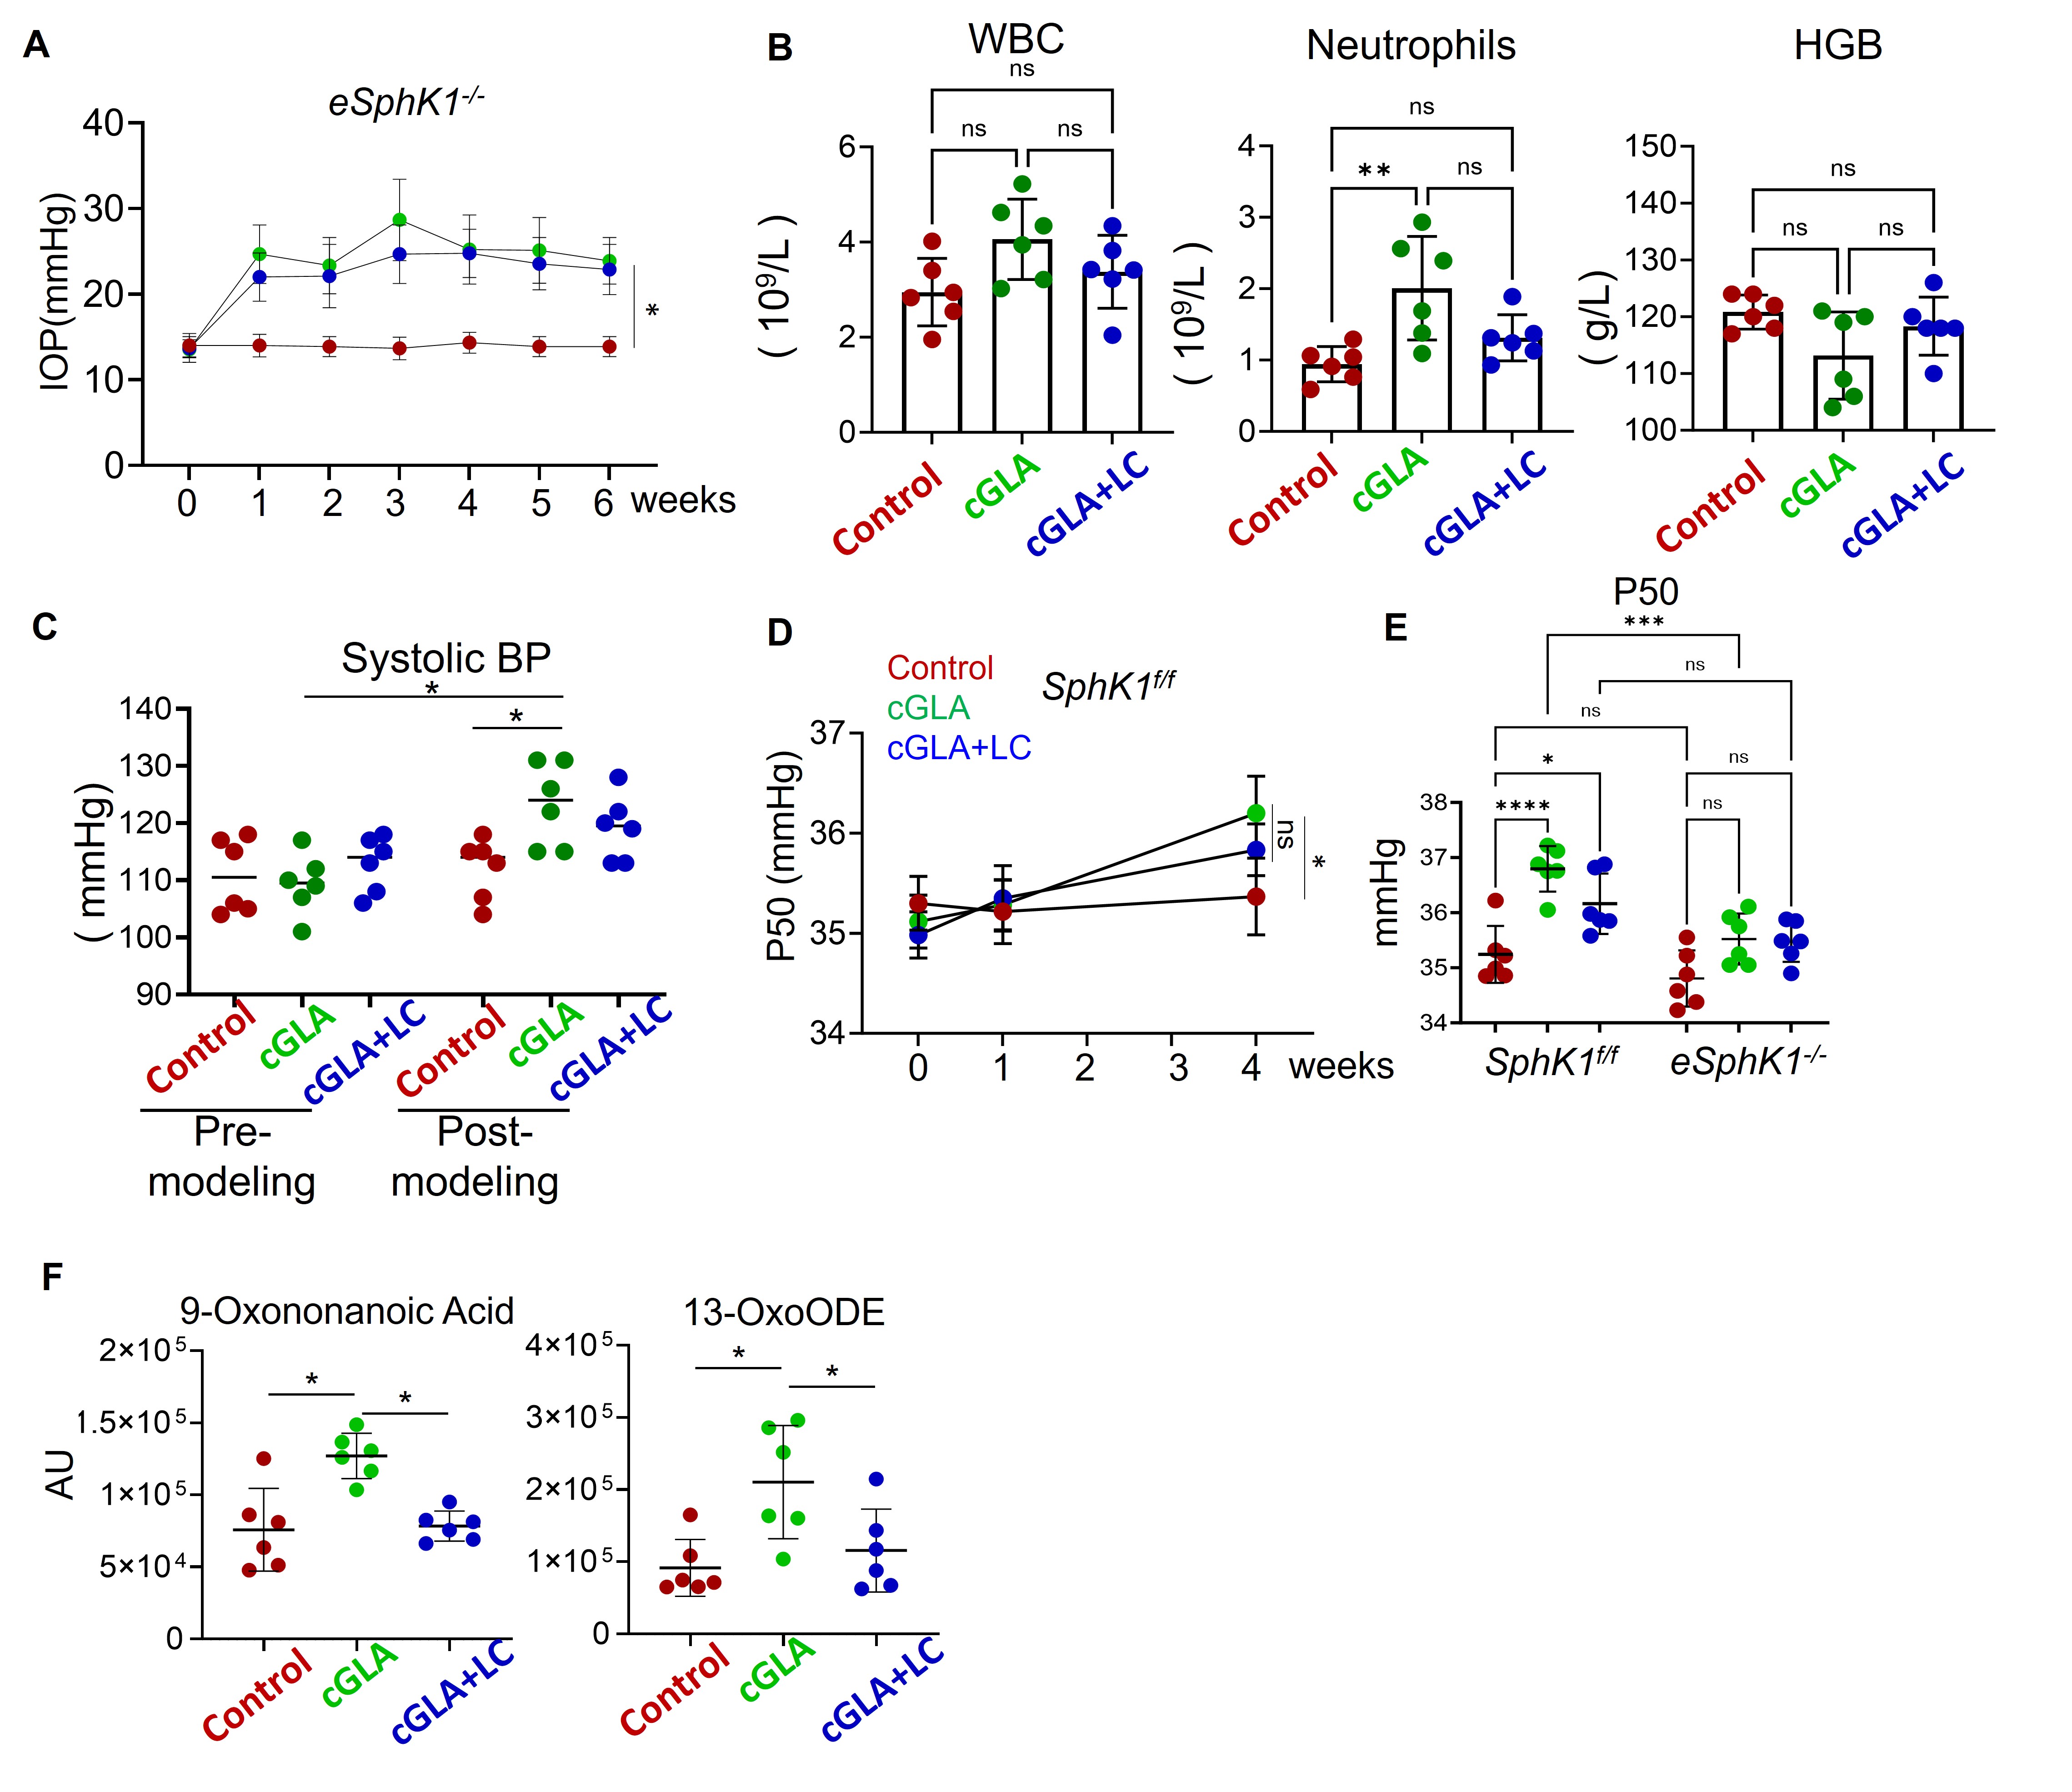
tailed unpaired t test, * *P* < 0.05.

**Figure S4. Systemic Responses in the cGLA Model: Leukogram, Blood Pressure, and Oxidative Stress.** (A) The IOP was monitored in cGLA of *eSphk1-/-* mice (n=6). (B) Complete blood count (CBC) data of *SphK1flox* cGLA model treated with or without L-carnitine(n=6). (C) Systolic blood pressure was measured in each group before and after induction of *SphK1flox* cGLA model(n=6). (D) P50 of erythrocytes was measured, at different time point, from *SphK1flox* cGLA model treated with or without L-carnitine (n=6). (E) P50 of erythrocytes from *eSphk1-/-* cGLA model treated with or without L-carnitine (n=6). (F) Levels of oxidized lipid species in erythrocytes from the *SphK1flox* cGLA model treated with or without L-carnitine(n=6).


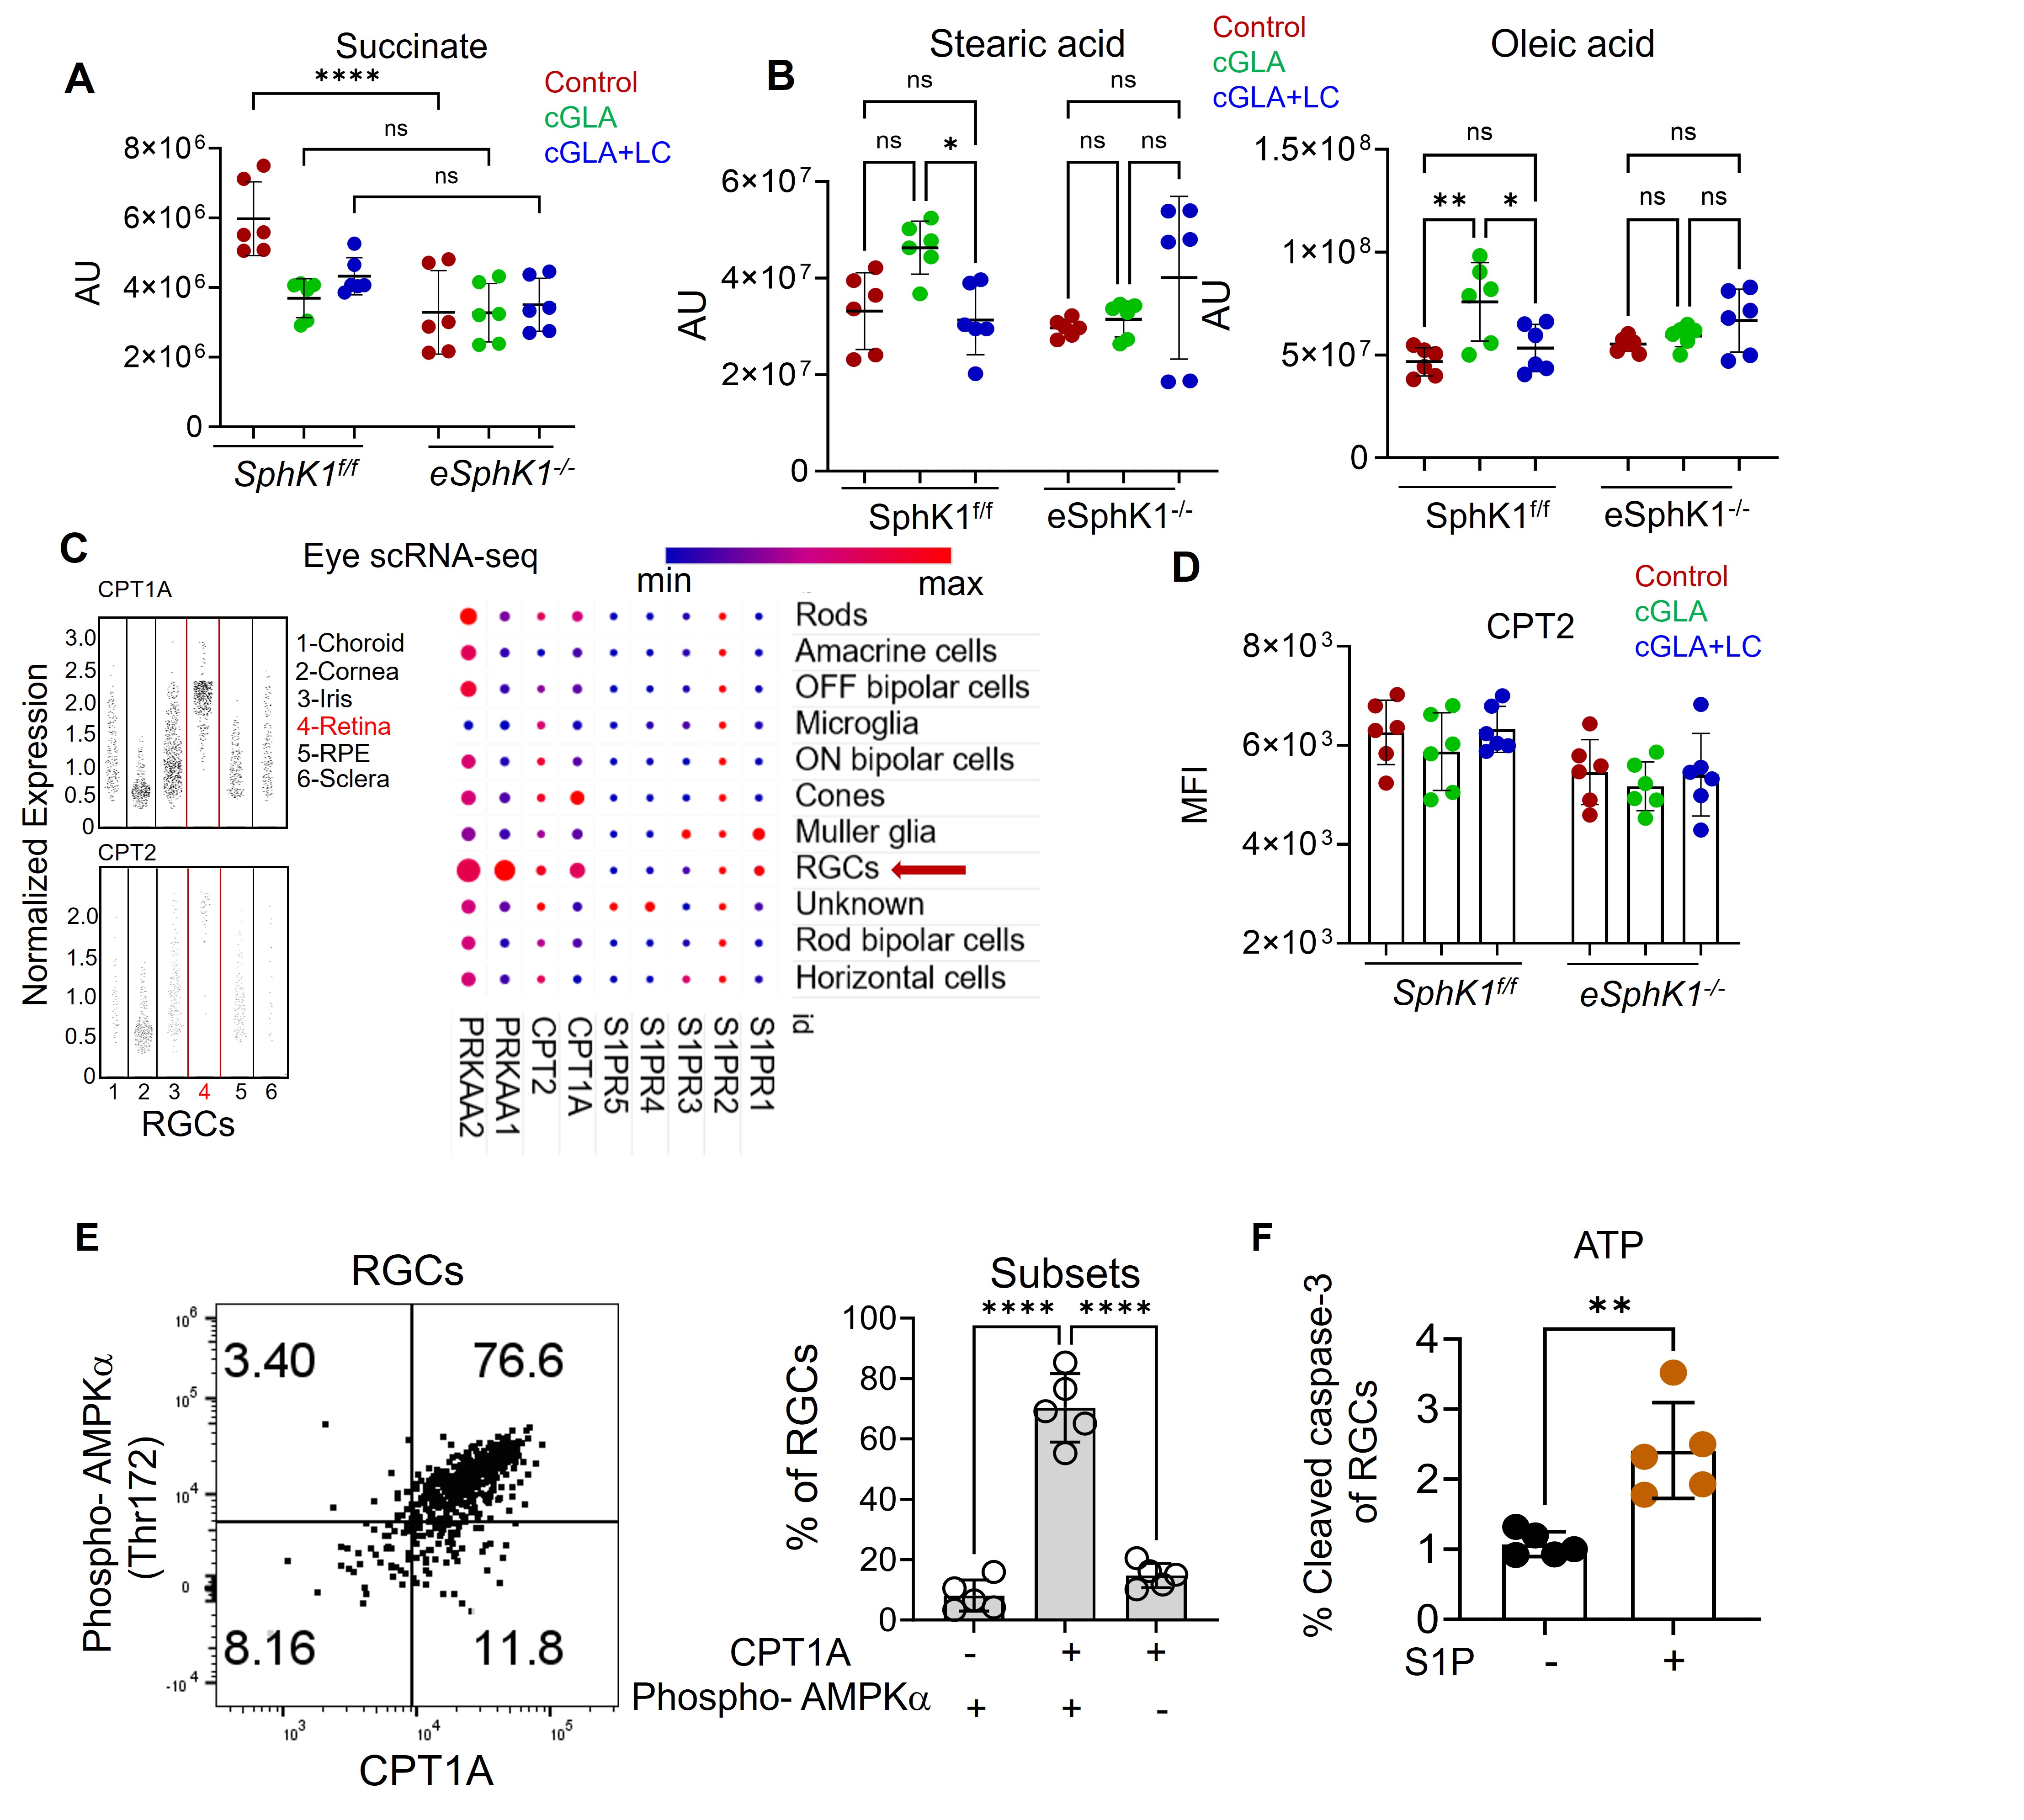


**Figure S5. The levels of long-chain fatty acids are increased in the retina of cGLA.** (A) The levels of succinate in retina of *Sphk1flox* and *eSphk1-/-* cGLA treated with or without L-carnitine (n=6). (B) The levels of long- chain fatty acid in retina of *Sphk1flox* and *eSphk1-/-* cGLA treated with or without L-carnitine (n=6). (C) Single-cell RNA sequencing (scRNA-seq) data from human eyes were reanalyzed from the public database GSE147979. (D) The protein levels of CPT2 in RGCs from retina of *Sphk1flox* and *eSphk1-/-* cGLA treated with or without L-carnitine (n=6). (E) The expression of CPT1A and phospho-AMPKa (Thr172) on RGCs by flow cytometry (n=5). (F) The ATP levels of RGCs cultured under oxygen-glucose deprivation/reperfusion conditions, with or without S1P in the presence of L-carnitine (n=5). *P* were assessed by two-tailed unpaired t test, * *P* < 0.05


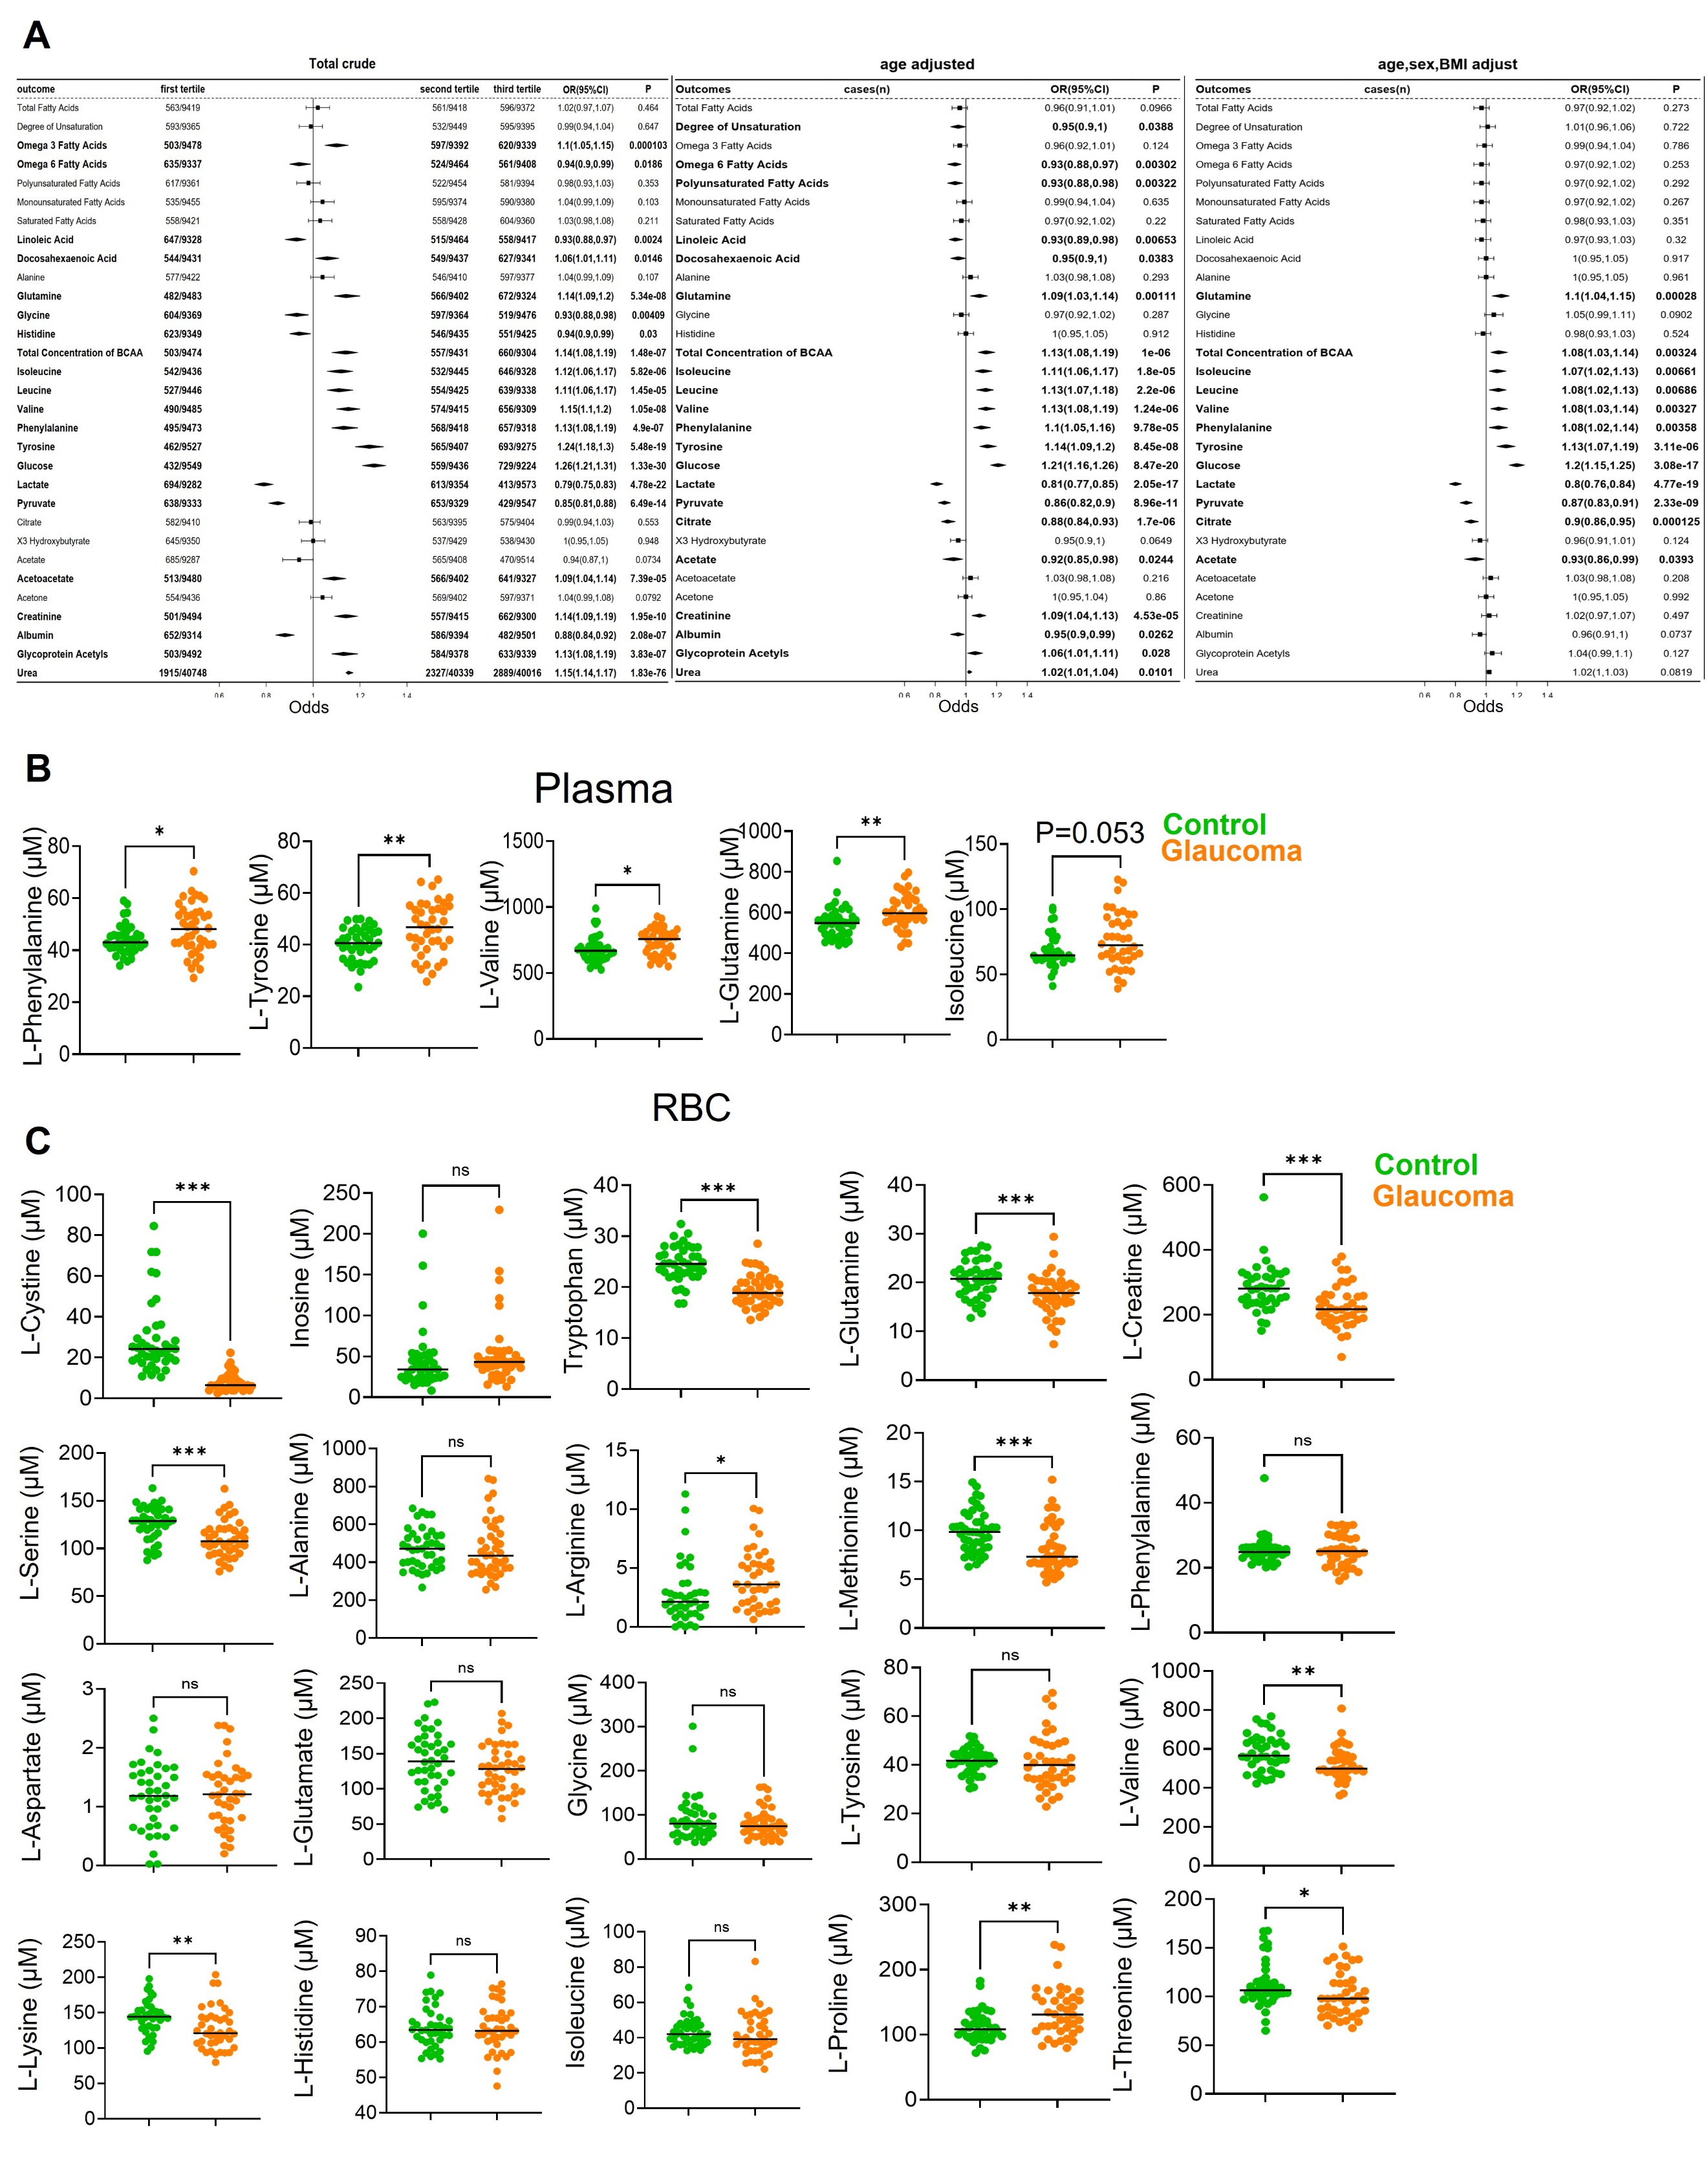


**Figure S6. Metabolomic profiling of amino acids in plasma and erythrocytes in glaucoma.** (A) Total crude, age adjusted and age, sex, BMI-adjusted baseline analysis of plasma metabolites significantly associated with POAG from the UK Biobank. (B-C) Quantitative analysis of indicated amino acid levels in glaucoma and control plasma and erythrocytes. *P* were assessed by two-tailed unpaired t test, * *P* < 0.05

**Supplemental Table 1. Treatment History of Glaucoma Patients**

| Variable | Primary Glaucoma (n=40) |  |  |
| --- | --- | --- | --- |
| Newly Diagnosed (n, %) | 12 (30%) |  |  |
| Previously Diagnosed (n, %) | 28 (70%) |  |  |
| Topical Medications (n, %) |  |  |  |
| - Prostaglandin Analogs | 9 (22.5%) |  |  |
| - Beta-Blockers | 14 (35%) |  |  |
| - Alpha-Agonists | 14 (35%) |  |  |
| - Carbonic Anhydrase Inhibitors | 8(20%) |  |  |
| Glaucoma Surgery (n, %) |  |  |  |
| - Trabeculectomy | 10 (25%) |  |  |
| - Laser Peripheral Iridotomy (PACG) | 3(7.5%) |  |  |
| Mean Duration of Treatment (years) | 1.5 ± 1.7 |  |  |

*Data expressed as n (%) or mean ± SD. Patients may be on multiple medications.*

**Supplemental Table 2.** List of all differential metabolites identified through metabolic screening in the erythrocyte and plasma of glaucoma and control group.

| **Erythrocyte** | | | |
| --- | --- | --- | --- |
| Metabolite name | Fold change | log2(FC) | p.value |
| Cadaverine | 7.4783 | 2.9027 | 1.35E-25 |
| Mannitol | 7.2535 | 2.8587 | 1.60E-06 |
| 3alpha-7alpha-12alpha-Trihydroxy-5beta-cholanate | 3.4487 | 1.786 | 0.002098 |
| L-Arginine | 2.9014 | 1.5368 | 1.31E-11 |
| Urate | 2.5889 | 1.3723 | 1.90E-12 |
| Hypoxanthine | 2.5025 | 1.3234 | 2.14E-16 |
| Sphingosine 1-phosphate | 2.3147 | 1.2108 | 1.63E-13 |
| Ectoine | 2.2565 | 1.1741 | 0.0009 |
| L-Tyrosine | 1.9749 | 0.98179 | 1.65E-16 |
| 2-3-Dinor-8-iso prostagLandin F2alpha | 1.8584 | 0.89404 | 5.42E-08 |
| Ornithine | 1.8065 | 0.85318 | 2.26E-23 |
| ADP-D-ribose | 1.7674 | 0.82159 | 5.61E-16 |
| Sphinganine 1-phosphate | 1.7214 | 0.78361 | 2.16E-15 |
| L-Proline | 1.7137 | 0.77715 | 3.44E-17 |
| Allantoate | 1.7126 | 0.77619 | 3.35E-14 |
| Dodecanedioic acid | 1.7073 | 0.77175 | 1.68E-09 |
| 1-4-beta-D-Xylan | 1.7036 | 0.76861 | 2.71E-07 |
| Glycochenodeoxycholate | 1.6782 | 0.74692 | 2.38E-06 |
| Cholesterol sulfate | 1.6692 | 0.73913 | 4.19E-10 |
| Taurochenodeoxycholate | 1.6545 | 0.72636 | 0.022928 |
| Taurodeoxycholate | 1.6545 | 0.72636 | 0.022928 |
| Tauroursodeoxycholic acid | 1.6545 | 0.72636 | 0.022928 |
| sn-Glycerol 3-phosphate | 1.5916 | 0.67051 | 7.42E-08 |
| S-Glutathionyl-L-cysteine | 1.5762 | 0.65642 | 1.48E-05 |
| N6-(1-2-Dicarboxyethyl)-AMP | 1.5709 | 0.65158 | 0.002143 |
| Inosine | 1.5636 | 0.64486 | 0.001576 |
| ProstagLandin D3 | 1.5475 | 0.62992 | 0.000769 |
| 3--5--Cyclic IMP | 1.5043 | 0.58906 | 1.07E-05 |
| alpha-D-Ribose 1-phosphate | 1.4907 | 0.57602 | 0.00043 |
| ProstagLandin G2 | 1.4848 | 0.57025 | 2.01E-27 |
| acyl-C4-DC | 1.4674 | 0.55329 | 9.74E-08 |
| N-N-Dimethylglycine | 1.4623 | 0.54825 | 7.74E-09 |
| L-Citrulline | 1.458 | 0.54402 | 1.50E-12 |
| L-Aspartate | 1.4447 | 0.53073 | 0.000281 |
| Carnosine | 1.4269 | 0.51285 | 2.14E-06 |
| L-Histidine | 1.4174 | 0.50327 | 2.71E-21 |
| L-Alanine | 1.413 | 0.49874 | 1.08E-11 |
| Glycine | 1.3971 | 0.48245 | 6.04E-13 |
| L-Lysine | 1.3959 | 0.48124 | 3.75E-11 |
| 5-6-Dihydrothymine | 1.393 | 0.4782 | 0.00488 |
| L-Threonine | 1.3795 | 0.46414 | 6.64E-09 |
| L-Asparagine | 1.3775 | 0.4621 | 9.18E-12 |
| 5-Hydroxyisourate | 1.3625 | 0.44622 | 1.12E-10 |
| GMP | 1.3585 | 0.44204 | 0.004505 |
| Undecanoic acid | 1.3546 | 0.43789 | 1.06E-20 |
| L-Phenylalanine | 1.3469 | 0.42962 | 1.21E-13 |
| alpha-D-Glucosamine 1-phosphate | 1.3448 | 0.42735 | 6.47E-07 |
| Pyridine-2-3-dicarboxylate | 1.3422 | 0.42464 | 6.83E-16 |
| Sphingosine | 1.3341 | 0.41591 | 9.90E-07 |
| Creatinine | 1.3322 | 0.41378 | 9.36E-08 |
| Nonanoic acid | 1.3191 | 0.3996 | 3.30E-14 |
| D-Glucose 6-phosphate | 1.3135 | 0.39346 | 0.000436 |
| L-Glutamine | 1.3112 | 0.39093 | 2.72E-08 |
| L-Valine | 1.3108 | 0.39042 | 7.01E-13 |
| Ascorbate | 1.303 | 0.38188 | 9.45E-08 |
| Adenine | 1.3028 | 0.38162 | 4.35E-09 |
| Xanthine | 1.3023 | 0.38101 | 0.000419 |
| Glycolate | 1.2961 | 0.3742 | 9.15E-08 |
| Indole | 1.2959 | 0.37392 | 2.34E-14 |
| Adenosine | 1.295 | 0.37291 | 2.92E-05 |
| D-Arabitol | 1.2902 | 0.3676 | 2.62E-11 |
| L-Serine | 1.2855 | 0.36235 | 1.79E-06 |
| CMP-N-acetylneuraminate | 1.267 | 0.34138 | 7.59E-05 |
| L-Glutamate | 1.2622 | 0.33599 | 0.000647 |
| Picolinic acid | 1.2556 | 0.32843 | 8.31E-08 |
| acyl-C16 (L-Palmitoylcarnitine) | 1.2521 | 0.32434 | 3.12E-05 |
| L-Leucine | 1.2501 | 0.322 | 1.23E-05 |
| 3-Methyldioxyindole | 1.2419 | 0.31259 | 1.52E-06 |
| D-Rhamnose | 1.2358 | 0.3054 | 0.011615 |
| Creatine | 1.2292 | 0.29769 | 0.000149 |
| Glutathione | 1.225 | 0.29279 | 0.000269 |
| Lactate | 1.2195 | 0.28625 | 0.000684 |
| Anthranilate | 1.217 | 0.28328 | 4.18E-11 |
| N-Methylethanolamine phosphate | 1.2146 | 0.28052 | 0.000939 |
| D-Ribose | 1.2144 | 0.28026 | 0.000186 |
| Dopamine | 1.2135 | 0.2792 | 7.63E-08 |
| acyl-C18 (Octadecanoyl-L-carnitine) | 1.2135 | 0.27918 | 0.000476 |
| Decanoic acid | 1.2101 | 0.27512 | 2.55E-06 |
| Dodecanoic acid | 1.1958 | 0.25798 | 0.02238 |
| acyl-C20:4 | 1.1886 | 0.24932 | 0.014839 |
| 5-Oxoproline | 1.1864 | 0.2466 | 0.000944 |
| UDP | 1.1796 | 0.23825 | 0.00335 |
| 2-Hydroxyglutarate | 1.1756 | 0.23344 | 0.029897 |
| acyl-C18:2 (Linoleoyl-CoA) | 1.1713 | 0.22815 | 0.00068 |
| Glutathione disulfide | 1.1593 | 0.21328 | 0.003595 |
| acyl-C18:1 (O-octadecenoyl-L-carnitine) | 1.1539 | 0.20656 | 0.001135 |
| trans-4-Hydroxy-L-proline | 1.1452 | 0.19556 | 0.027345 |
| D-Glucose | 1.1368 | 0.185 | 0.024549 |
| L-Tryptophan | 1.1334 | 0.18071 | 0.001253 |
| Pyridoxal | 1.1221 | 0.16619 | 0.000113 |
| ProstagLandin D2 | 1.106 | 0.14535 | 0.038144 |
| ProstagLandin E2 | 1.106 | 0.14535 | 0.038144 |
| Glycocholate | 1.0878 | 0.12145 | 0.00145 |
| D-Glucosamine | 1.0575 | 0.080623 | 0.035905 |
| Fumarate | 0.91006 | -0.13597 | 0.01352 |
| acyl-C16:1 (Hexadecenoyl-carnitine) | 0.89804 | -0.15514 | 0.023275 |
| acyl-C3 (propionyl-carnitine) | 0.86623 | -0.20718 | 0.031053 |
| (S)-Malate | 0.85752 | -0.22175 | 0.000337 |
| Guanine | 0.83454 | -0.26095 | 0.010291 |
| (5Z-8Z-11Z-14Z-17Z)-Icosapentaenoic acid | 0.8202 | -0.28595 | 0.003935 |
| Phosphoenolpyruvate | 0.79119 | -0.33791 | 0.003385 |
| ADP | 0.79037 | -0.3394 | 4.65E-05 |
| Phosphocreatine | 0.76724 | -0.38225 | 0.00218 |
| D-Erythrose 4-phosphate | 0.76711 | -0.3825 | 1.68E-06 |
| Dehydroascorbate | 0.7584 | -0.39897 | 2.60E-05 |
| Tetradecanoic acid | 0.726 | -0.46197 | 2.21E-05 |
| 6-Phospho-D-gluconate | 0.71102 | -0.49204 | 2.87E-07 |
| Indoxyl | 0.70685 | -0.50052 | 0.003254 |
| 7alpha-Hydroxy-3-oxo-4-cholestenoate | 0.68863 | -0.53819 | 5.26E-07 |
| ATP | 0.68346 | -0.54907 | 3.87E-06 |
| Linoleate | 0.67523 | -0.56655 | 1.77E-08 |
| 3-Phospho-D-glyceroyl phosphate | 0.6423 | -0.63869 | 8.01E-05 |
| Citrate | 0.6392 | -0.64567 | 6.02E-08 |
| (9Z)-Octadecenoic acid | 0.63613 | -0.65261 | 1.85E-09 |
| Stearidonic acid | 0.62569 | -0.67648 | 9.21E-06 |
| (9Z-12Z-15Z)-Octadecatrienoic acid | 0.62008 | -0.68947 | 3.07E-07 |
| acyl-C14:1 (Tetradecenoyl Carnitine) | 0.5952 | -0.74854 | 1.13E-09 |
| Orthophosphate | 0.57374 | -0.80152 | 7.84E-17 |
| (8Z-11Z-14Z)-Icosatrienoic acid | 0.57171 | -0.80665 | 2.90E-09 |
| acyl-C12 (O-dodecanoyl-carnitine) | 0.56718 | -0.81813 | 6.89E-10 |
| (7Z-10Z-13Z-16Z-19Z)-Docosa-7-10-13-16-19-pentaenoic acid | 0.56003 | -0.83643 | 6.58E-09 |
| 3-Sulfocatechol | 0.55073 | -0.86058 | 0.000982 |
| Taurine | 0.53712 | -0.89668 | 5.96E-14 |
| (9Z)-Hexadecenoic acid | 0.50667 | -0.98087 | 1.05E-11 |
| (4Z-7Z-10Z-13Z-16Z-19Z)-Docosahexaenoic acid | 0.4953 | -1.0136 | 2.18E-12 |
| acyl-C12:1 (O-dodecenoyl-carnitine) | 0.46387 | -1.1082 | 3.26E-16 |
| Indole-3-acetaldehyde | 0.45268 | -1.1434 | 9.87E-08 |
| 7-10-13-16-Docosatetraenoic acid | 0.44741 | -1.1603 | 4.17E-13 |
| acyl-C10:1 (O-Decenoyl-L-carnitine) | 0.4061 | -1.3001 | 6.04E-20 |
| (9Z)-Tetradecenoic acid | 0.39342 | -1.3459 | 8.18E-17 |
| IDP | 0.37837 | -1.4021 | 1.10E-12 |
| acyl-C10 (O-Decanoyl-L-carnitine) | 0.35788 | -1.4824 | 3.32E-16 |
| acyl-C18:2-OH | 0.30447 | -1.7156 | 2.55E-23 |
| 13(S)-HODE | 0.29647 | -1.754 | 3.60E-15 |
| 9(S)-HODE | 0.29647 | -1.754 | 3.60E-15 |
| Maltose | 0.29047 | -1.7835 | 0.000401 |
| IMP | 0.2772 | -1.851 | 7.58E-18 |
| Diphosphate | 0.20156 | -2.3107 | 3.30E-16 |
| **Plasma** | | | |
| Metabolite name | Fold change | log2(FC) | p.value |
| Leucocyanidin | 86.284 | 6.431 | 8.60E-45 |
| L-Aspartate | 9.8785 | 3.3043 | 4.42E-41 |
| Cadaverine | 6.566 | 2.715 | 2.70E-16 |
| (Z)-5-Oxohex-2-enedioate | 5.2501 | 2.3923 | 5.45E-21 |
| Spermine | 4.0465 | 2.0167 | 2.12E-29 |
| alpha-D-Ribose 1-phosphate | 3.0904 | 1.6278 | 1.18E-07 |
| 3alpha-7alpha-12alpha-Trihydroxy-5beta-cholanate | 2.9338 | 1.5527 | 0.010648 |
| L-Arginine | 2.7089 | 1.4377 | 3.87E-28 |
| Hypoxanthine | 2.6858 | 1.4254 | 1.70E-10 |
| Taurochenodeoxycholate | 2.197 | 1.1355 | 3.70E-05 |
| Mannitol | 2.1841 | 1.127 | 0.000411 |
| Spermidine | 1.9353 | 0.95253 | 4.86E-16 |
| 5-Hydroxyisourate | 1.7675 | 0.82169 | 8.63E-19 |
| N-Acetylornithine | 1.7038 | 0.76875 | 4.29E-05 |
| ProstagLandin D3 | 1.6731 | 0.74253 | 2.06E-08 |
| 4-Acetamidobutanoate | 1.6054 | 0.68297 | 0.016587 |
| 6-Pyruvoyltetrahydropterin | 1.5987 | 0.67691 | 0.001458 |
| N-Methylethanolamine phosphate | 1.5435 | 0.62625 | 8.96E-12 |
| 2-Hydroxyglutarate | 1.4133 | 0.49906 | 1.19E-07 |
| D-Glucose | 1.3179 | 0.39822 | 2.54E-10 |
| 2-Methyleneglutarate | 1.2974 | 0.37567 | 1.42E-06 |
| D-Ribose | 1.2949 | 0.37285 | 0.000198 |
| Pentobarbital | 1.2633 | 0.33721 | 0.047723 |
| 1-4-beta-D-Xylan | 1.2613 | 0.33495 | 1.57E-06 |
| Hexanoic acid | 1.2137 | 0.27939 | 0.001892 |
| Glycocholate | 1.1989 | 0.26173 | 4.13E-05 |
| 2-3-Dinor-8-iso prostagLandin F2alpha | 1.1557 | 0.20876 | 0.035226 |
| UDP | 1.1424 | 0.19208 | 1.26E-08 |
| L-Cystine | 1.1395 | 0.18845 | 0.012031 |
| 9(S)-HODE | 1.1218 | 0.16579 | 0.030244 |
| L-Adrenaline | 1.104 | 0.14278 | 0.029786 |
| Glycolate | 1.0967 | 0.13316 | 0.007968 |
| Adenine | 0.94067 | -0.08823 | 0.040499 |
| Ascorbate | 0.93658 | -0.09452 | 0.041338 |
| 2-Oxoglutaramate | 0.93615 | -0.09519 | 0.049942 |
| 9-Oxononanoic acid | 0.92141 | -0.11808 | 0.018005 |
| L-Phenylalanine | 0.91759 | -0.12408 | 0.014338 |
| Indole | 0.90148 | -0.14964 | 0.013811 |
| D-Glyceraldehyde 3-phosphate | 0.89752 | -0.15598 | 3.53E-06 |
| N-N-Dimethylglycine | 0.8969 | -0.15698 | 0.011703 |
| IDP | 0.86363 | -0.21151 | 0.002448 |
| O-Propanoylcarnitine | 0.85724 | -0.22223 | 0.005829 |
| Sphinganine 1-phosphate | 0.85672 | -0.2231 | 0.007206 |
| L-Methionine | 0.85554 | -0.2251 | 0.000571 |
| L-Lysine | 0.83296 | -0.26369 | 1.96E-06 |
| 10-Hydroxydecanoic acid | 0.83107 | -0.26696 | 0.013282 |
| Cortisol | 0.82996 | -0.26889 | 0.015107 |
| trans-4-Hydroxy-L-proline | 0.80737 | -0.30869 | 1.15E-08 |
| Urate | 0.80268 | -0.3171 | 2.65E-05 |
| Butanoic acid | 0.77553 | -0.36674 | 2.48E-12 |
| L-Tyrosine | 0.76655 | -0.38354 | 0.002591 |
| 5-Guanidino-2-oxopentanoate | 0.75813 | -0.39948 | 6.99E-13 |
| Pentanoate | 0.75196 | -0.41127 | 3.36E-08 |
| Lactate | 0.73615 | -0.44192 | 4.19E-09 |
| Uracil | 0.72977 | -0.45448 | 2.42E-11 |
| L-Serine | 0.72818 | -0.45763 | 6.23E-09 |
| Succinate | 0.70484 | -0.50463 | 3.36E-16 |
| Dehydroascorbate | 0.70235 | -0.50974 | 1.50E-11 |
| 3--5--Cyclic IMP | 0.67589 | -0.56514 | 5.62E-08 |
| Sphingosine | 0.65377 | -0.61315 | 6.16E-08 |
| L-Palmitoylcarnitine | 0.62034 | -0.68887 | 1.39E-15 |
| Pantothenate | 0.5947 | -0.74976 | 1.37E-08 |
| Biliverdin | 0.57841 | -0.78985 | 1.07E-07 |
| Fumarate | 0.56552 | -0.82235 | 1.11E-19 |
| Ornithine | 0.56177 | -0.83195 | 1.58E-20 |
| Malate | 0.54158 | -0.88476 | 2.16E-22 |
| Xanthine | 0.54129 | -0.88553 | 3.43E-13 |
| Anthranilate | 0.53858 | -0.89276 | 9.22E-11 |
| 2-Oxoglutarate | 0.51713 | -0.95139 | 1.86E-27 |
| 5-Oxoproline | 0.51183 | -0.96627 | 7.80E-22 |
| 4-Pyridoxate | 0.50534 | -0.98468 | 1.35E-14 |
| (7Z-10Z-13Z-16Z-19Z)-Docosa-7-10-13-16-19-pentaenoic acid | 0.48805 | -1.0349 | 6.06E-11 |
| Allantoate | 0.46222 | -1.1133 | 1.05E-28 |
| Dopamine | 0.4539 | -1.1396 | 5.20E-17 |
| O-Decanoyl-L-carnitine | 0.45337 | -1.1412 | 1.84E-12 |
| (5-L-Glutamyl)-L-glutamine | 0.44789 | -1.1588 | 6.64E-17 |
| Bilirubin | 0.42726 | -1.2268 | 1.75E-11 |
| ProstagLandin E2 | 0.38741 | -1.3681 | 7.00E-12 |
| ProstagLandin D2 | 0.38741 | -1.3681 | 7.00E-12 |
| Sphingosine 1-phosphate | 0.38119 | -1.3914 | 5.30E-48 |
| Pyruvate | 0.33457 | -1.5796 | 1.36E-38 |
| (5Z-8Z-11Z-14Z-17Z)-Icosapentaenoic acid | 0.32897 | -1.604 | 0.000105 |
| Indole-3-acetaldehyde | 0.25591 | -1.9663 | 2.40E-13 |
| 3-Sulfocatechol | 0.22881 | -2.1278 | 1.74E-14 |
| S-Glutathionyl-L-cysteine | 0.059125 | -4.0801 | 2.32E-26 |
| N-Carbamyl-L-glutamate | 0.053583 | -4.2221 | 4.20E-08 |
